# Supplementary material
Source: Elsevier journal article supplement (https://www.sciencedirect.com/science/article/pii/S030028962200521X)
Supplement: mmc2 [file S030028962200521X:mmc2.doc]

**Supplementary material**

**Hyperglycemia in acute critically ill COVID-19 patients**

**Supplementary Table 1. Demographic and clinical characteristics of the study population by hyperglycemia at ICU admission, for patients with diabetes mellitus (N=1,425)**

| **Variables** | **All patients (N = 1,425)** | **No hyperglycemia (N = 189)** | **Hyperglycemia (N = 1,236)** | **P-value** |
| --- | --- | --- | --- | --- |
| Age, median (Q1; Q3), years | 67 (60; 73) | 67 (60; 73) | 67 (60; 73) | 0.590 |
| Male sex, n (%) | 1,041 (73) | 126 (67) | 915 (74) | **0.031** |
| BMI, median (Q1; Q3), kg/m2 | 29.7 (26.5; 33.5) | 29.1 (25.7; 32.6) | 29.8 (26.6; 33.7) | **0.008** |
| BMI, n (%) |  |  |  | 0.055 |
| Underweight (<18.5 kg/m2) | 0 (0) | 0 (0) | 0 (0) | - |
| Normal weight (≥18.5 - <25 kg/m2) | 178 (14) | 31 (18) | 147 (13) | - |
| Pre-Obese (≥25 - <30 kg/m2) | 486 (38) | 72 (42) | 414 (38) | - |
| Obese (≥30 kg/m2) | 607 (48) | 68 (40) | 539 (49) | - |
| Comorbidities, n (%) |  |  |  |  |
| Active smoker | 91 (7) | 14 (8) | 77 (7) | 0.609 |
| Hypertension | 1,080 (76) | 146 (77) | 934 (76) | 0.615 |
| Diabetes mellitus | 1,425 (100) | 189 (100) | 1,236 (100) | - |
| Dyslipidemia | 619 (44) | 72 (38) | 547 (44) | 0.118 |
| Chronic heart disease | 313 (22) | 40 (21) | 273 (22) | 0.775 |
| Chronic liver disease | 71 (5) | 15 (8) | 56 (5) | **0.045** |
| Chronic lung disease | 265 (19) | 41 (22) | 224 (18) | 0.240 |
| Chronic renal failure | 195 (14) | 36 (19) | 159 (13) | **0.022** |
| Immunosuppression | 70 (5) | 16 (8) | 54 (4) | **0.015** |
| Nursing-home, n (%) | 29 (2) | 5 (3) | 24 (2) | 0.579 |
| Previous 30 days admission, n (%) | 67 (5) | 18 (10) | 49 (4) | **0.001** |
| Previous antibiotic, n (%) | 188 (13) | 35 (19) | 153 (12) | **0.018** |
| Days from first symptoms to hospital admission, median (Q1; Q3) | 7 (4; 9) | 7 (4; 9) | 6 (4; 9) | 0.931 |
| Days from hospital admission to ICU admission, median (Q1; Q3) | 1 (0; 4) | 2 (0; 5) | 1 (0; 3) | **0.001** |
| Symptoms at hospital admission, n (%) |  |  |  |  |
| Fever | 1,123 (80) | 147 (78) | 976 (80) | 0.468 |
| Dry cough | 818 (58) | 117 (62) | 701 (58) | 0.231 |
| Productive cough | 173 (12) | 23 (13) | 150 (12) | 0.947 |
| Dyspnoea | 1,012 (72) | 137 (72) | 875 (72) | 0.789 |
| Fatigue | 587 (42) | 79 (42) | 508 (42) | 0.949 |
| Muscle pain | 374 (27) | 56 (30) | 318 (26) | 0.295 |
| Diarrhoea | 301 (21) | 41 (21) | 260 (21) | 0.901 |
| Confusion | 104 (7) | 13 (7) | 91 (7) | 0.795 |
| Characteristics on ICU admission |  |  |  |  |
| Glasgow Coma Scale, median (Q1; Q3) | 15 (15; 15) | 15 (15; 15) | 15 (15; 15) | 0.169 |
| APACHE-II score, median (Q1; Q3) | 13 (10; 18) | 13 (10; 17) | 13 (10; 18) | 0.776 |
| SOFA score, median (Q1; Q3) | 5 (4; 8) | 5 (4; 7) | 5 (4; 8) | 0.344 |
| Temperature, median (Q1; Q3), ºC | 36.7 (36; 37.5) | 36.8 (36; 37.7) | 36.7 (36; 37.4) | 0.181 |
| Respiratory rate, median (Q1; Q3), breaths per min | 26 (21; 31) | 25 (20; 32) | 26 (22; 30) | 0.629 |
| Arterial blood gases at ICU admission |  |  |  |  |
| PaO2/FiO2 ratio, median (Q1; Q3) | 107.5 (78; 152.8) | 107.5 (75.3; 142.2) | 107.5 (78; 154.1) | 0.577 |
| PaO2/FiO2 ratio, n (%) |  |  |  | 0.943 |
| Severe (<100) | 536 (44) | 65 (44) | 471 (44) | - |
| Moderate (≥100 - <200) | 499 (41) | 63 (43) | 436 (41) | - |
| Mild (≥200 - <300) | 131 (11) | 15 (10) | 116 (11) | - |
| No ARDS (≥300) | 41 (3) | 4 (3) | 37 (3) | - |
| pH, median (Q1; Q3) | 7.39 (7.31; 7.45) | 7.41 (7.32; 7.45) | 7.39 (7.31; 7.45) | 0.112 |
| PaCO2, median (Q1; Q3), mmHg | 40 (34; 47.5) | 39 (33.5; 45.9) | 40 (34; 47.8) | 0.597 |
| Laboratory findings at ICU admission |  |  |  |  |
| Glucose, median (Q1; Q3), mg/dL | 207 (153; 274) | 108 (91; 117) | 220 (173; 287) | **<0.001** |
| Haemoglobin, median (Q1; Q3), g/dL | 12.9 (11.6; 14.2) | 12.5 (11; 14) | 13 (11.8; 14.2) | **0.002** |
| Leucocyte count, median (Q1; Q3), 109/L | 8.7 (6.2; 12.4) | 8.3 (5.8; 11.8) | 8.8 (6.3; 12.5) | 0.127 |
| Lymphocyte count, median (Q1; Q3), 109/L | 0.69 (0.46; 0.98) | 0.75 (0.51; 1.04) | 0.66 (0.45; 0.97) | **0.014** |
| Neutrophil count, median (Q1; Q3), 109/L | 7.6 (5.2; 11) | 6.8 (4.5; 10.1) | 7.7 (5.2; 11) | **0.012** |
| Neutrophil-to-lymphocyte ratio, median (Q1; Q3) | 11.4 (6.8; 17.8) | 8.9 (5.2; 16) | 11.7 (7.1; 18.2) | **<0.001** |
| Platelet count, median (Q1; Q3), 109/L | 226 (173; 292) | 226 (164; 298) | 226 (173; 292) | 0.972 |
| D-dimers, median (Q1; Q3), ng/mL | 1,054 (568; 2,460) | 1,164 (632; 2,890) | 1,047 (562; 2,380) | 0.136 |
| Ferritin, median (Q1; Q3), ng/mL | 934 (488; 1,623) | 861 (471; 1,655) | 964 (498; 1,615) | 0.494 |
| C-reactive protein, median (Q1; Q3), mg/L | 139 (70; 227) | 139 (54; 226) | 139 (70; 227) | 0.423 |
| C-reactive protein ≥150 mg/L, n (%) | 630 (47) | 86 (48) | 544 (46) | 0.783 |
| C-reactive protein-to-lymphocyte ratio, median (Q1; Q3) | 201.2 (87;4; 385.9) | 178.5 (66.4; 370.6) | 205.7 (89.5; 388.1) | 0.096 |
| IL-6, median (Q1; Q3), pg/mL | 93.8 (29.5; 225.2) | 115.3 (37.3; 395) | 92.6 (29.4; 211) | 0.241 |
| Serum creatinine, median (Q1; Q3), mg/dL | 0.91 (0.72; 1.29) | 0.85 (0.66; 1.21) | 0.92 (0.74; 1.29) | 0.052 |
| LDH, median (Q1; Q3), U/L | 457 (349; 634) | 477 (355; 690) | 455 (349; 623) | 0.125 |
| Respiratory support at ICU admission, n (%) |  |  |  | **0.001** |
| Conventional oxygen therapy | 86 (6) | 17 (9) | 69 (6) | 0.064 |
| High-flow nasal cannula | 337 (24) | 62 (33) | 275 (22) | **0.001** |
| Non-invasive mechanical ventilation | 185 (13) | 19 (10) | 166 (13) | 0.205 |
| Invasive mechanical ventilation | 815 (57) | 90 (48) | 725 (59) | **0.005** |
| Septic shock at ICU admission, n (%)a | 104 (8) | 7 (4) | 97 (9) | **0.031** |
| Corticosteroids during ICU admission, n (%) | 1,231 (87) | 152 (81) | 1,079 (89) | **0.003** |
| Remdesivir during ICU admission, n (%) | 210 (15) | 23 (12) | 187 (15) | 0.281 |
| Complications during ICU admission, n (%) |  |  |  |  |
| Bacterial pneumoniab | 465 (33) | 53 (28) | 412 (33) | 0.148 |
| Acute renal failure | 593 (42) | 75 (40) | 518 (42) | 0.601 |
| Liver dysfunction | 369 (26) | 51 (27) | 318 (26) | 0.688 |
| Cardiac injuryc | 234 (16) | 24 (13) | 210 (17) | 0.138 |
| Outcomes |  |  |  |  |
| Length of hospital stay, median (Q1; Q3), days |  |  |  |  |
| All patients | 26 (15; 45) | 26 (16; 44) | 26 (15; 45) | 0.422 |
| Surviving patients | 31 (18.5; 54.5) | 30.5 (18; 55) | 31 (19; 54) | 0.670 |
| Length of ICU stay, median (Q1; Q3), days |  |  |  |  |
| All patients | 15 (8; 30) | 15 (8; 32) | 15 (8; 30) | 0.956 |
| Surviving patients | 16 (8; 34) | 17 (8; 40) | 16 (8; 33) | 0.936 |
| ICU mortality, n (%) | 527 (37) | 71 (38) | 456 (37) | 0.858 |
| In-hospital mortality, n (%) | 569 (40) | 75 (40) | 494 (40) | 0.941 |
| 90-day mortality, n (%)d | 563 (43) | 73 (42) | 490 (43) | 0.897 |

Abbreviations: ICU indicates intensive care unit; Q1, first quartile; Q3, third quartile; BMI, body mass index; APACHE, acute physiology and chronic health evaluation; SOFA, sequential organ failure assessment; PaO2, partial pressure of arterial oxygen; FiO2, fraction of inspired oxygen; LDH, lactate dehydrogenase. Percentages calculated on non-missing data. P-values marked in bold indicate numbers that are statistically significant on the 95% confidence limit. a Criteria for the Sepsis-3 definition of septic shock include vasopressor treatment and a lactate concentration >2 mmol/L. b Clinically or radiologically diagnosed bacterial pneumonia managed with antimicrobials. Bacteriological confirmation was not required. c Cardiac injury include cardiac arrest, myocardial infarction, endocarditis, myocarditis/pericarditis, cardiomyopathy, heart failure and cardiac ischemia. d Calculated only for patients with 90-day follow-up (173 in the non-invasive mechanical ventilation group and 1,147 in the invasive mechanical ventilation group).

**Supplementary Table 2. Demographic and clinical characteristics of the study population by hyperglycemia at ICU admission, for patients without diabetes mellitus (N=4,338)**

| **Variables** | **All patients (N = 4,338)** | **No hyperglycemia (N = 1,870)** | **Hyperglycemia (N = 2,468)** | **P-value** |
| --- | --- | --- | --- | --- |
| Age, median (Q1; Q3), years | 62 (53; 70) | 60 (50; 69) | 63 (55; 71) | **<0.001** |
| Male sex, n (%) | 3,020 (70) | 1,294 (69) | 1,726 (70) | 0.591 |
| BMI, median (Q1; Q3), kg/m2 | 28.5 (26; 31.9) | 28.1 (25.5; 31.5) | 28.8 (26; 32.1) | **0.001** |
| BMI, n (%) |  |  |  | **<0.001** |
| Underweight (<18.5 kg/m2) | 14 (0.4) | 7 (0.4) | 7 (0.3) | 0.607 |
| Normal weight (≥18.5 - <25 kg/m2) | 693 (18) | 349 (21) | 344 (16) | **<0.001** |
| Pre-Obese (≥25 - <30 kg/m2) | 1,648 (43) | 699 (43) | 949 (44) | 0.391 |
| Obese (≥30 kg/m2) | 1,448 (38) | 588 (36) | 860 (40) | **0.011** |
| Comorbidities, n (%) |  |  |  |  |
| Active smoker | 218 (5) | 92 (5) | 126 (6) | 0.681 |
| Hypertension | 1,824 (42) | 717 (38) | 1,107 (45) | **<0.001** |
| Diabetes mellitus | 0 (0) | 0 (0) | 0 (0) | - |
| Dyslipidemia | 1,174 (27) | 455 (24) | 719 (29) | **<0.001** |
| Chronic heart disease | 421 (10) | 166 (9) | 255 (10) | 0.108 |
| Chronic liver disease | 129 (3) | 60 (3) | 69 (3) | 0.428 |
| Chronic lung disease | 622 (14) | 250 (13) | 372 (15) | 0.113 |
| Chronic renal failure | 211 (5) | 103 (6) | 108 (4) | 0.086 |
| Immunosuppression | 166 (4) | 82 (4) | 84 (3) | 0.094 |
| Nursing-home, n (%) | 61 (1) | 25 (1) | 36 (2) | 0.718 |
| Previous 30 days admission, n (%) | 134 (3) | 65 (3) | 69 (3) | 0.200 |
| Previous antibiotic, n (%) | 608 (14) | 249 (13) | 359 (15) | 0.226 |
| Days from first symptoms to hospital admission, median (Q1; Q3) | 7 (5; 9) | 7 (5; 9) | 7 (5; 10) | 0.282 |
| Days from hospital admission to ICU admission, median (Q1; Q3) | 2 (0; 4) | 2 (0; 4) | 1 (0; 3) | **<0.001** |
| Symptoms at hospital admission, n (%) |  |  |  |  |
| Fever | 3,690 (86) | 1,626 (87) | 2,064 (85) | **0.008** |
| Dry cough | 2,691 (63) | 1,182 (64) | 1,509 (62) | 0.216 |
| Productive cough | 563 (13) | 258 (14) | 305 (13) | 0.173 |
| Dyspnoea | 3,139 (73) | 1,332 (72) | 1,807 (74) | 0.138 |
| Fatigue | 1,653 (39) | 700 (38) | 953 (39) | 0.386 |
| Muscle pain | 1,159 (27) | 532 (29) | 627 (26) | **0.032** |
| Diarrhoea | 928 (22) | 395 (21) | 533 (22) | 0.672 |
| Confusion | 156 (4) | 56 (3) | 100 (4) | 0.063 |
| Characteristics on ICU admission |  |  |  |  |
| Glasgow Coma Scale, median (Q1; Q3) | 15 (15; 15) | 15 (15; 15) | 15 (15; 15) | **<0.001** |
| APACHE-II score, median (Q1; Q3) | 11 (8; 15) | 11 (8; 14) | 12 (9; 16) | **<0.001** |
| SOFA score, median (Q1; Q3) | 5 (3; 7) | 4 (3; 7) | 5 (4; 8) | **<0.001** |
| Temperature, median (Q1; Q3), ºC | 36.8 (36; 37.5) | 36.9 (36.2; 37.7) | 36.7 (36; 37.4) | **<0.001** |
| Respiratory rate, median (Q1; Q3), breaths per min | 25 (21; 31) | 26 (22; 32) | 25 (21; 30) | **0.017** |
| Arterial blood gases at ICU admission |  |  |  |  |
| PaO2/FiO2 ratio, median (Q1; Q3) | 113.8 (80; 166.7) | 114.1 (78.8; 168) | 113.3 (81.4; 166) | 0.568 |
| PaO2/FiO2 ratio, n (%) |  |  |  | 0.954 |
| Severe (<100) | 1,504 (41) | 637 (41) | 867 (41) | - |
| Moderate (≥100 - <200) | 1,564 (43) | 652 (42) | 912 (43) | - |
| Mild (≥200 - <300) | 425 (12) | 175 (11) | 250 (12) | - |
| No ARDS (≥300) | 174 (5) | 71 (5) | 103 (5) | - |
| pH, median (Q1; Q3) | 7.42 (7.35; 7.46) | 7.43 (7.37; 7.46) | 7.41 (7.33; 7.46) | **<0.001** |
| PaCO2, median (Q1; Q3), mmHg | 39 (34; 46.8) | 38 (33; 45) | 40 (34; 48) | **<0.001** |
| Laboratory findings at ICU admission |  |  |  |  |
| Glucose, median (Q1; Q3), mg/dL | 132 (109; 165) | 106 (95; 115) | 159 (140; 193) | **<0.001** |
| Haemoglobin, median (Q1; Q3), g/dL | 13.3 (12; 14.4) | 13.3 (12; 14.5) | 13.3 (12.1; 14.4) | 0.931 |
| Leucocyte count, median (Q1; Q3), 109/L | 9 (6.5; 12.5) | 8.3 (6; 11.6) | 9.5 (6.9; 13.3) | **<0.001** |
| Lymphocyte count, median (Q1; Q3), 109/L | 0.69 (0.47; 0.98) | 0.76 (0.5; 1.05) | 0.61 (0.4; 0.9) | **<0.001** |
| Neutrophil count, median (Q1; Q3), 109/L | 7.7 (5.2; 11.2) | 6.9 (4.8; 10.1) | 8.4 (5.8; 12) | **<0.001** |
| Neutrophil-to-lymphocyte ratio, median (Q1; Q3) | 11.1 (6.7; 18.9) | 9 (5.5; 15.3) | 13 (8.2; 21.8) | **<0.001** |
| Platelet count, median (Q1; Q3), 109/L | 234 (178; 307) | 231 (175; 304) | 236 (182; 308) | 0.069 |
| D-dimers, median (Q1; Q3), ng/mL | 970 (500; 2,228) | 909 (470; 2,057) | 1,000 (522; 2,457) | **<0.001** |
| Ferritin, median (Q1; Q3), ng/mL | 1,210 (650; 1,976) | 1,182 (648; 1,945) | 1,238 (651; 2,001) | 0.366 |
| C-reactive protein, median (Q1; Q3), mg/L | 126 (60; 219) | 131 (62; 226) | 123 (59; 215) | 0.114 |
| C-reactive protein ≥150 mg/L, n (%) | 1,735 (42) | 777 (44) | 958 (41) | 0.069 |
| C-reactive protein-to-lymphocyte ratio, median (Q1; Q3) | 177.8 (75;7; 353.3) | 168.2 (68.6; 329.4) | 185 (79.9; 370) | **0.001** |
| IL-6, median (Q1; Q3), pg/mL | 79.4 (26.7; 223.5) | 105.2 (42.4; 273) | 62 (20.4; 198.4) | **<0.001** |
| Serum creatinine, median (Q1; Q3), mg/dL | 0.81 (0.66; 1.02) | 0.79 (0.64; 0.98) | 0.83 (0.67; 1.06) | **<0.001** |
| LDH, median (Q1; Q3), U/L | 481 (366; 657) | 477 (363; 634) | 486 (368; 666) | **0.038** |
| Respiratory support at ICU admission, n (%) |  |  |  | **<0.001** |
| Conventional oxygen therapy | 323 (7) | 192 (10) | 131 (5) | **<0.001** |
| High-flow nasal cannula | 1,263 (29) | 662 (35) | 601 (24) | **<0.001** |
| Non-invasive mechanical ventilation | 450 (10) | 212 (11) | 238 (10) | 0.069 |
| Invasive mechanical ventilation | 2,299 (53) | 802 (43) | 1,497 (61) | **<0.001** |
| Septic shock at ICU admission, n (%)a | 298 (7) | 69 (4) | 229 (10) | **<0.001** |
| Corticosteroids during ICU admission, n (%) | 3,685 (86) | 1,504 (81) | 2,181 (89) | **<0.001** |
| Remdesivir during ICU admission, n (%) | 661 (15) | 311 (17) | 350 (14) | **0.027** |
| Complications during ICU admission, n (%) |  |  |  |  |
| Bacterial pneumoniab | 1,156 (27) | 432 (23) | 724 (29) | **<0.001** |
| Acute renal failure | 1,248 (29) | 481 (26) | 767 (31) | **<0.001** |
| Liver dysfunction | 1,375 (32) | 582 (31) | 793 (32) | 0.487 |
| Cardiac injuryc | 425 (10) | 160 (9) | 265 (11) | **0.017** |
| Outcomes |  |  |  |  |
| Length of hospital stay, median (Q1; Q3), days |  |  |  |  |
| All patients | 23 (14; 39) | 23 (14; 39) | 23 (15; 40) | 0.353 |
| Surviving patients | 25 (15; 42) | 24 (15; 41) | 26 (16; 45) | **0.012** |
| Length of ICU stay, median (Q1; Q3), days |  |  |  |  |
| All patients | 13 (7; 26) | 12 (6; 25) | 14 (7; 28) | **<0.001** |
| Surviving patients | 12 (7; 25) | 11.5 (6; 23) | 13 (7; 28) | **<0.001** |
| ICU mortality, n (%) | 1,121 (26) | 421 (23) | 700 (28) | **<0.001** |
| In-hospital mortality, n (%) | 1,172 (27) | 438 (23) | 734 (30) | **<0.001** |
| 90-day mortality, n (%)d | 1,170 (29) | 440 (26) | 730 (32) | **<0.001** |

Abbreviations: ICU indicates intensive care unit; Q1, first quartile; Q3, third quartile; BMI, body mass index; APACHE, acute physiology and chronic health evaluation; SOFA, sequential organ failure assessment; PaO2, partial pressure of arterial oxygen; FiO2, fraction of inspired oxygen; LDH, lactate dehydrogenase. Percentages calculated on non-missing data. P-values marked in bold indicate numbers that are statistically significant on the 95% confidence limit. a Criteria for the Sepsis-3 definition of septic shock include vasopressor treatment and a lactate concentration >2 mmol/L. b Clinically or radiologically diagnosed bacterial pneumonia managed with antimicrobials. Bacteriological confirmation was not required. c Cardiac injury include cardiac arrest, myocardial infarction, endocarditis, myocarditis/pericarditis, cardiomyopathy, heart failure and cardiac ischemia. d Calculated only for patients with 90-day follow-up (1,722 in the non-invasive mechanical ventilation group and 2,271 in the invasive mechanical ventilation group).

**Supplementary Table 3. Multivariable models assessing predictors of bacterial pneumonia using mixed-effects regression analysis (Panel A) and predictors of in-hospital mortality using competing risks survival analysis (Panel B), for patients with diabetes mellitus (N=1,425)**

| **Panel A** | | |
| --- | --- | --- |
| **Variables** | **OR (95% CI)** | **P-value** |
| Age (+1 year)a | 1.00 (0.99 to 1.02) | 0.553 |
| Male sex | 0.68 (0.51 to 0.91) | 0.010 |
| Chronic heart disease | 0.95 (0.70 to 1.30) | 0.747 |
| Chronic liver disease | 1.73 (0.98 to 3.06) | 0.057 |
| Chronic lung disease | 0.76 (0.54 to 1.05) | 0.097 |
| Chronic renal failure | 0.71 (0.47 to 1.05) | 0.085 |
| Immunosuppression | 1.72 (0.93 to 3.17) | 0.085 |
| Previous 30 days admission | 0.79 (0.41 to 1.49) | 0.462 |
| Previous antibiotic | 0.99 (0.68 to 1.46) | 0.976 |
| C-reactive protein at ICU admission (+50 mg/L)b | 1.02 (0.99 to 1.05) | 0.208 |
| Lymphocyte count (+1 109/L)a | 0.98 (0.88 to 1.09) | 0.692 |
| Platelet count at ICU admission (+50 x109/L)b | 1.00 (0.94 to 1.06) | 0.936 |
| Ferritin at ICU admission (+1,000 ng/mL)c | 1.01 (0.94 to 1.09) | 0.722 |
| D-dimers at ICU admission (+1,000 ng/mL)c | 1.01 (1.00 to 1.02) | 0.052 |
| LDH at ICU admission (+50 U/L)b | 1.01 (0.99 to 1.04) | 0.266 |
| Hyperglycemia (glucose ≥126 mg/dL) at ICU admission | 1.18 (0.80 to 1.73) | 0.406 |
| Respiratory support at ICU admission |  |  |
| Conventional oxygen therapy | 1.00 | - |
| High-flow nasal cannula | 2.18 (1.03 to 4.61) | 0.042 |
| Non-invasive mechanical ventilation | 3.39 (1.51 to 7.61) | 0.003 |
| Invasive mechanical ventilation | 4.43 (2.17 to 9.03) | <0.001 |
| Corticosteroids during ICU admission | 1.97 (1.28 to 3.04) | .002 |
| Panel B | | |
| **Variables** | **sHR (95% CI)** | **P-value** |
| Age (+1 year)a | 1.04 (1.03 to 1.05) | <0.001 |
| Male sex | 0.75 (0.60 to 0.93) | 0.008 |
| Chronic heart disease | 1.08 (0.88 to 1.34) | 0.46 |
| Chronic liver disease | 0.93 (0.61 to 1.42) | 0.74 |
| Chronic lung disease | 1.26 (1.01 to 1.57) | 0.041 |
| Chronic renal failure | 1.53 (1.19 to 1.97) | <0.001 |
| Immunosuppression | 1.51 (1.04 to 2.20) | 0.031 |
| Previous 30 days admission | 1.01 (0.65 to 1.57) | 0.95 |
| C-reactive protein at ICU admission (+50 mg/L)b | 1.00 (0.99 to 1.02) | 0.83 |
| Lymphocyte count (+1 109/L)a | 1.00 (0.95 to 1.06) | 0.95 |
| Platelet count at ICU admission (+50 x109/L)b | 0.96 (0.91 to 1.00) | 0.047 |
| Ferritin at ICU admission (+1,000 ng/mL)c | 1.05 (1.00 to 1.10) | 0.033 |
| D-dimers at ICU admission (+1,000 ng/mL)c | 1.01 (1.00 to 1.01) | 0.058 |
| LDH at ICU admission (+50 U/L)b | 1.01 (1.00 to 1.03) | 0.083 |
| Hyperglycemia (glucose ≥126 mg/dL) at ICU admission | 1.19 (0.92 to 1.54) | 0.19 |
| Bacterial pneumonia during ICU admission | 0.90 (0.74 to 1.09) | 0.28 |
| Respiratory support at ICU admission |  |  |
| Conventional oxygen therapy | 1.00 | - |
| High-flow nasal cannula | 1.23 (0.73 to 2.07) | 0.45 |
| Non-invasive mechanical ventilation | 1.81 (1.04 to 3.17) | 0.037 |
| Invasive mechanical ventilation | 2.04 (1.22 to 3.40) | 0.007 |
| Corticosteroids during ICU admission | 0.54 (0.41 to 0.71) | <0.001 |
| Remdesivir during ICU admission | 0.81 (0.63 to 1.04) | 0.099 |

Abbreviations: OR indicates odds ratio; CI, confidence interval; ICU, intensive care unit; LDH, lactate dehydrogenase; sHR indicates subdistribution hazard ratio. In Panel A data are shown as estimated ORs (95% CIs) of the explanatory variables in the bacterial pneumonia group and the P-value is based on the null hypothesis that all ORs relating to an explanatory variable equal unity (no effect). Area under the ROC curve, AUC=0.77 (95% CI 0.75 to 0.80). In Panel B data are shown as estimated sHRs (95% CIs) of the explanatory variables in the in-hospital mortality group and the P-value is based on the null hypothesis that all sHRs relating to an explanatory variable equal unity (no effect). a “+1” means a one-unit increase on the scale in the predictor variable (i.e., going from 1 to 2, 2 to 3, etc.). b “+50” means a fifty-unit increase on the scale in the predictor variable (i.e., going from 1 to 50, 50 to 100, etc.). c “+1,000” means a one thousand-unit increase on the scale in the predictor variable (i.e., going from 1,000 to 2,000, 2,000 to 3,000, etc.).

**Supplementary Table 4. Multivariable models assessing predictors of bacterial pneumonia using mixed-effects regression analysis (Panel A) and predictors of in-hospital mortality using competing risks survival analysis (Panel B), for patients without diabetes mellitus (N=4,338)**

| **Panel A** | | | |
| --- | --- | --- | --- |
| **Variables** | **OR (95% CI)** | **P-value** |
| Age (+1 year)a | 1.01 (1.01 to 1.02) | <0.001 |
| Male sex | 0.81 (0.68 to 0.95) | 0.011 |
| Chronic heart disease | 1.09 (0.85 to 1.39) | 0.513 |
| Chronic liver disease | 1.13 (0.74 to 1.73) | 0.572 |
| Chronic lung disease | 0.98 (0.79 to 1.20) | 0.816 |
| Chronic renal failure | 0.78 (0.54 to 1.13) | 0.186 |
| Immunosuppression | 1.46 (0.99 to 2.14) | 0.055 |
| Previous 30 days admission | 1.03 (0.67 to 1.59) | 0.899 |
| Previous antibiotic | 0.76 (0.61 to 0.95) | 0.016 |
| C-reactive protein at ICU admission (+50 mg/L)b | 1.01 (0.99 to 1.03) | 0.285 |
| Lymphocyte count (+1 109/L)a | 0.98 (0.94 to 1.03) | 0.503 |
| Platelet count at ICU admission (+50 x109/L)b | 0.96 (0.93 to 1.00) | 0.033 |
| Ferritin at ICU admission (+1,000 ng/mL)c | 1.02 (0.98 to 1.06) | 0.312 |
| D-dimers at ICU admission (+1,000 ng/mL)c | 1.00 (0.99 to 1.00) | 0.257 |
| LDH at ICU admission (+50 U/L)b | 1.01 (1.00 to 1.02) | 0.103 |
| Hyperglycemia (glucose ≥126 mg/dL) at ICU admission | 1.09 (0.93 to 1.27) | 0.289 |
| Respiratory support at ICU admission |  |  |
| Conventional oxygen therapy | 1.00 | - |
| High-flow nasal cannula | 1.27 (0.87 to 1.85) | 0.211 |
| Non-invasive mechanical ventilation | 1.76 (1.13 to 2.72) | 0.012 |
| Invasive mechanical ventilation | 3.24 (2.27 to 4.61) | <0.001 |
| Corticosteroids during ICU admission | 1.64 (1.29 to 2.09) | <0.001 |
| Panel B | | | |
| **Variables** | **sHR (95% CI)** | **P-value** |
| Age (+1 year)a | 1.06 (1.06 to 1.07) | <0.001 |
| Male sex | 0.91 (0.79 to 1.04) | 0.16 |
| Chronic heart disease | 1.21 (1.02 to 1.43) | 0.033 |
| Chronic liver disease | 1.26 (0.91 to 1.75) | 0.17 |
| Chronic lung disease | 1.28 (1.09 to 1.50) | 0.003 |
| Chronic renal failure | 1.47 (1.15 to 1.87) | 0.002 |
| Immunosuppression | 1.76 (1.34 to 2.31) | <0.001 |
| Previous 30 days admission | 1.67 (1.27 to 2.19) | <0.001 |
| C-reactive protein at ICU admission (+50 mg/L)b | 1.01 (1.00 to 1.02) | 0.11 |
| Lymphocyte count (+1 109/L)a | 1.01 (0.98 to 1.03) | 0.49 |
| Platelet count at ICU admission (+50 x109/L)b | 0.92 (0.89 to 0.95) | <0.001 |
| Ferritin at ICU admission (+1,000 ng/mL)c | 0.99 (0.96 to 1.02) | 0.49 |
| D-dimers at ICU admission (+1,000 ng/mL)c | 1.00 (1.00 to 1.01) | 0.005 |
| LDH at ICU admission (+50 U/L)b | 1.02 (1.01 to 1.02) | <0.001 |
| Hyperglycemia (glucose ≥126 mg/dL) at ICU admission | 1.10 (0.97 to 1.25) | 0.13 |
| Bacterial pneumonia during ICU admission | 1.16 (1.02 to 1.33) | 0.027 |
| Respiratory support at ICU admission |  |  |
| Conventional oxygen therapy | 1.00 | - |
| High-flow nasal cannula | 0.73 (0.54 to 0.99) | 0.041 |
| Non-invasive mechanical ventilation | 1.25 (0.91 to 1.74) | 0.17 |
| Invasive mechanical ventilation | 1.48 (1.13 to 1.95) | 0.005 |
| Corticosteroids during ICU admission | 0.95 (0.78 to 1.17) | 0.65 |
| Remdesivir during ICU admission | 0.80 (0.67 to 0.96) | 0.014 |

Abbreviations: OR indicates odds ratio; CI, confidence interval; ICU, intensive care unit; LDH, lactate dehydrogenase; sHR indicates subdistribution hazard ratio. In Panel A data are shown as estimated ORs (95% CIs) of the explanatory variables in the bacterial pneumonia group and the P-value is based on the null hypothesis that all ORs relating to an explanatory variable equal unity (no effect). Area under the ROC curve, AUC=0.74 (95% CI 0.73 to 0.76). In Panel B data are shown as estimated sHRs (95% CIs) of the explanatory variables in the in-hospital mortality group and the P-value is based on the null hypothesis that all sHRs relating to an explanatory variable equal unity (no effect). a “+1” means a one-unit increase on the scale in the predictor variable (i.e., going from 1 to 2, 2 to 3, etc.). b “+50” means a fifty-unit increase on the scale in the predictor variable (i.e., going from 1 to 50, 50 to 100, etc.). c “+1,000” means a one thousand-unit increase on the scale in the predictor variable (i.e., going from 1,000 to 2,000, 2,000 to 3,000, etc.).

**Supplementary Table 5. Multivariable models assessing predictors of bacterial pneumonia using mixed-effects regression analysis (Panel A) and predictors of in-hospital mortality using competing risks survival analysis (Panel B), using cut-off value of glucose**

| **Panel A** | | |
| --- | --- | --- |
| **Variables** | **OR (95% CI)** | **P-value** |
| Age (+1 year)a | 1.01 (1.01 to 1.02) | <0.001 |
| Male sex | 0.77 (0.67 to 0.89) | <0.001 |
| Chronic heart disease | 1.04 (0.86 to 1.25) | 0.707 |
| Chronic liver disease | 1.35 (0.97 to 1.88) | 0.076 |
| Chronic lung disease | 0.91 (0.76 to 1.08) | 0.284 |
| Chronic renal failure | 0.76 (0.58 to 0.99) | 0.040 |
| Immunosuppression | 1.49 (1.08 to 2.05) | 0.016 |
| Previous 30 days admission | 0.94 (0.66 to 1.35) | 0.744 |
| Previous antibiotic | 0.81 (0.67 to 0.98) | 0.027 |
| C-reactive protein at ICU admission (+50 mg/L)b | 1.01 (1.00 to 1.03) | 0.082 |
| Lymphocyte count (+1 109/L)a | 0.98 (0.94 to 1.03) | 0.434 |
| Platelet count at ICU admission (+50 x109/L)b | 0.97 (0.94 to 1.00) | 0.046 |
| Ferritin at ICU admission (+1,000 ng/mL)c | 1.02 (0.98 to 1.05) | 0.297 |
| D-dimers at ICU admission (+1,000 ng/mL)c | 1.00 (1.00 to 1.00) | 0.651 |
| LDH at ICU admission (+50 U/L)b | 1.01 (1.00 to 1.02) | 0.047 |
| Glucose at ICU admission ≥150 mg/dLd | 1.07 (0.94 to 1.22) | 0.300 |
| Respiratory support at ICU admission |  |  |
| Conventional oxygen therapy | 1.00 | - |
| High-flow nasal cannula | 1.45 (1.04 to 2.02) | 0.029 |
| Non-invasive mechanical ventilation | 2.11 (1.44 to 3.08) | <0.001 |
| Invasive mechanical ventilation | 3.50 (2.55 to 4.79) | <0.001 |
| Corticosteroids during ICU admission | 1.72 (1.40 to 2.12) | <0.001 |
| Panel B | | |
| **Variables** | **sHR (95% CI)** | **P-value** |
| Age (+1 year)a | 1.06 (1.05 to 1.06) | <0.001 |
| Male sex | 0.85 (0.76 to 0.96) | 0.006 |
| Chronic heart disease | 1.17 (1.03 to 1.34) | 0.019 |
| Chronic liver disease | 1.06 (0.82 to 1.37) | 0.65 |
| Chronic lung disease | 1.23 (1.08 to 1.40) | 0.002 |
| Chronic renal failure | 1.55 (1.31 to 1.84) | <0.001 |
| Immunosuppression | 1.59 (1.27 to 1.99) | <0.001 |
| Previous 30 days admission | 1.41 (1.12 to 1.77) | 0.003 |
| C-reactive protein at ICU admission (+50 mg/L)b | 1.01 (1.00 to 1.02) | 0.071 |
| Lymphocyte count (+1 109/L)a | 1.01 (0.98 to 1.03) | 0.64 |
| Platelet count at ICU admission (+50 x109/L)b | 0.93 (0.91 to 0.96) | <0.001 |
| Ferritin at ICU admission (+1,000 ng/mL)c | 1.00 (0.97 to 1.03) | 0.94 |
| D-dimers at ICU admission (+1,000 ng/mL)c | 1.00 (1.00 to 1.01) | 0.007 |
| LDH at ICU admission (+50 U/L)b | 1.02 (1.01 to 1.02) | <0.001 |
| Glucose at ICU admission ≥150 mg/dLd | 1.17 (1.06 to 1.29) | 0.002 |
| Bacterial pneumonia during ICU admission | 1.08 (0.96 to 1.20) | 0.19 |
| Respiratory support at ICU admission |  |  |
| Conventional oxygen therapy | 1.00 | - |
| High-flow nasal cannula | 0.86 (0.66 to 1.11) | 0.25 |
| Non-invasive mechanical ventilation | 1.39 (1.05 to 1.84) | 0.020 |
| Invasive mechanical ventilation | 1.60 (1.26 to 2.04) | <0.001 |
| Corticosteroids during ICU admission | 0.79 (0.67 to 0.92) | 0.003 |
| Remdesivir during ICU admission | 0.82 (0.71 to 0.95) | 0.007 |

Abbreviations: OR indicates odds ratio; CI, confidence interval; ICU, intensive care unit; LDH, lactate dehydrogenase; sHR indicates subdistribution hazard ratio. In Panel A data are shown as estimated ORs (95% CIs) of the explanatory variables in the bacterial pneumonia group and the P-value is based on the null hypothesis that all ORs relating to an explanatory variable equal unity (no effect). Area under the ROC curve, AUC=0.75 (95% CI 0.73 to 0.76). In Panel B data are shown as estimated sHRs (95% CIs) of the explanatory variables in the in-hospital mortality group and the P-value is based on the null hypothesis that all sHRs relating to an explanatory variable equal unity (no effect). a “+1” means a one-unit increase on the scale in the predictor variable (i.e., going from 1 to 2, 2 to 3, etc.). b “+50” means a fifty-unit increase on the scale in the predictor variable (i.e., going from 1 to 50, 50 to 100, etc.). c “+1,000” means a one thousand-unit increase on the scale in the predictor variable (i.e., going from 1,000 to 2,000, 2,000 to 3,000, etc.). d Cut-off value obtained from ROC curve for bacterial pneumonia and/or in-hospital mortality.
